# Supplementary material for: DNA origami signposts for identifying proteins on cell membranes by electron cryotomography
Source: PubMed Central journal article supplement (PMC7895908; doi:10.1016/j.cell.2021.01.033), 2021-02-18
Supplement: mmc1.pdf [file mmc1.pdf]

**Cell, Volume 184**

## **Supplemental Information**

### **DNA origami signposts for identifying proteins on cell membranes by electron cryotomography**

**Emma Silvester, Benjamin Vollmer, Vojtěch Pražák, Daven Vasishtan, Emily A. Machala, Catheryne Whittle, Susan Black, Jonathan Bath, Andrew J. Turberfield, Kay Grünewald, and Lindsay A. Baker**

**Table S1** –List of oligonucleotide staples required to construct SPOTs and their precursors or derivatives, related to STAR Methods. This table is also available as a CSV file for ordering from commercial oligonucleotide suppliers (Table S4). All oligonucleotides require a standard desalting purification unless indicated.

| Name                           | Sequence                                                     | Mix | Notes   |
|--------------------------------|--------------------------------------------------------------|-----|---------|
| <b>Staple Oligonucleotides</b> |                                                              |     |         |
| A-0[111]16[102]                | TCGCCAGCAGGGAGACTTTTCAACATTGAAAGATTCA                        | 1   | 25 nmol |
| A-0[195]4[182]                 | TTGTATCGGATTTTCATAGTTAGCGTAAACCCCTCATAGGTTG                  | 1   | 25 nmol |
| A-1[116]67[121]                | AAGCATCTTTAATCACCCGCTTAACAATTTTTCAATATATATCTTTAG             | 1   | 25 nmol |
| A-1[140]5[149]                 | CCCTCAGGATACCGAGTAACAGTG                                     | 1   | 25 nmol |
| A-1[163]3[174]                 | ACGTTGGTGAATAGTTAATGCCCCCTTACTCAGCCCTCAG                     | 1   | 25 nmol |
| A-1[203]3[216]                 | AACTTTCAAAGGAGCATGAAAGTATTAAAGAGGGTGGGATAG                   | 1   | 25 nmol |
| A-1[85]13[90]                  | TTTTTCGGTCGCTTAGTAAATGGGGTGAATTAC                            | 1   | 25 nmol |
| A-10[106]66[92]                | CCAGCGGATATTCAATTGTCATTTCTTAGAGTGAGTAACCGAAC                 | 1   | 25 nmol |
| A-10[136]66[130]               | CCACGCCTTAGCCATATGGAGCGGAGACTTTTACA                          | 1   | 25 nmol |
| A-10[166]31[166]               | TTTTCTCAGAACTAAAAACAGTTTT                                    | 1   | 25 nmol |
| A-11[105]6[98]                 | ACATCAATCATACAGAACGAGGAGGCTTCGCATAAGTGTGACTGCTCC             | 1   | 25 nmol |
| A-11[126]67[139]               | GAGCCACCACCGGACGACTTGCAACGCTCCTCAAACATAA                     | 1   | 25 nmol |
| A-11[64]67[90]                 | TTTTGCTCATTAGATTCCCGCAACTATCGACTCAGTCCCAAGCTTGCAATAAGG       | 1   | 25 nmol |
| A-12[134]5[125]                | TTTTATTAGCGTTTTGCGCCGCTTAATGACATTTAACG                       | 1   | 25 nmol |
| A-13[64]69[95]                 | TTTTCAACTTTAAATGGTCAATTTGACCCCAATTAACGAACCACCGAGAGAATAAAACAG | 1   | 25 nmol |
| A-13[91]13[111]                | CTTATGCGATTTAAAGGGCAT                                        | 1   | 25 nmol |
| A-14[111]51[101]               | TACATCAACTGGCTCAACGGAATCATGAGGCCACTAAACGGAGTAGCACCCACCGACAGT | 1   | 25 nmol |
| A-14[127]13[134]               | TTTTTGTAGCCGCTTTTTTCGGTCATAGCCCCCTTTTTT                      | 1   | 25 nmol |
| A-14[90]40[81]                 | CAGTCAGGAATTAGCAATAAAGCC                                     | 1   | 25 nmol |
| A-15[68]15[90]                 | TTTTAAAAATCTACGTTAATAAA                                      | 1   | 25 nmol |
| A-16[101]17[127]               | TCAGGAATTACGAGGAGCAATCAAGTTTGCTTTT                           | 1   | 25 nmol |
| A-16[127]15[127]               | TTTTCTTTAGCAGGTAATTACGTCAGACTTTT                             | 1   | 25 nmol |
| A-16[90]42[81]                 | TTAGGAAGAAGCCTGCAAGGATAA                                     | 1   | 25 nmol |
| A-18[127]20[98]                | TTTTTAATCAGTAGCGACATAGTAAGAGCAAGGCTTTGTTTTGC                 | 1   | 25 nmol |
| A-19[68]20[77]                 | TTTTACGACGATAAAAGTAAAT                                       | 1   | 25 nmol |
| A-2[132]21[131]                | ACAGAGGCTTTGAGTAAAACGACCAAGCGCCGGAAATTTT                     | 1   | 25 nmol |
| A-2[143]10[137]                | TAGCATACACTTTTACCCTCCAGTGCCTTGATAGTTGGCAGGTCCCA              | 1   | 25 nmol |
| A-2[167]1[162]                 | GTCGCTTTTGCATCAGACACCCAG                                     | 1   | 25 nmol |
| A-2[209]0[196]                 | CCACAGAATTTTCATGATATAAGTATAGTCTGAAACCTTTAA                   | 1   | 25 nmol |
| A-20[131]19[127]               | TTTTTCGTCACCAATGAAACCATAAGAATGCAACGATAGCAGCACCGTTTT          | 1   | 25 nmol |
| A-21[84]45[107]                | AGCAAAAGGTAAATAACCAAAATAAAGTACAGCTAATGCAGAACGCGCTTTTT        | 1   | 25 nmol |
| A-22[131]51[131]               | TTTTTCATTAAGGCGAGTAGGGCTTTT                                  | 1   | 25 nmol |
| A-23[93]7[111]                 | TGAGGATGTTACCTTTGAAAGAGGAGTAAAGCGT                           | 1   | 25 nmol |
| A-23[98]95[107]                | GAGGGAAAAGGGCGTTAAATATACCGACTGCCGTAAG                        | 1   | 25 nmol |
| A-24[131]53[131]               | TTTTTGGTTTTACCAATCATAATTTTT                                  | 1   | 25 nmol |
| A-24[92]53[83]                 | CAACTGCTTTAAACAGAAAGATTG                                     | 1   | 25 nmol |
| A-25[112]59[127]               | CAATAGAAAAGAAAACATACAGAATACCGATGATGAAACAAATCAATATCGATAGCTT   | 1   | 25 nmol |
| A-25[54]51[69]                 | AATCAAAAATTCGCGTTAAATCAGCTCATTACGTTAAGCCCAATGTACCCAGAGAAAT   | 1   | 25 nmol |
| A-25[86]26[90]                 | TAGTCAGAAATTTGGAATAAG                                        | 1   | 25 nmol |
| A-26[104]55[107]               | ACACCACTATTTTGCAAATCCTCAAATATAT                              | 1   | 25 nmol |
| A-26[131]25[131]               | TTTTCAACATATAAAATTCATATTTT                                   | 1   | 25 nmol |
| A-26[89]6[81]                  | CAAAGCTGACCAATTAGCCGGAA                                      | 1   | 25 nmol |
| A-27[50]57[65]                 | TTTTCGAAAGACTGGGAAACATCAACATTA                               | 1   | 25 nmol |
| A-27[77]62[91]                 | TTAATTTACGCAAGTATGTTAGTGATTAATCAATTAATCGCGC                  | 1   | 25 nmol |
| A-28[142]62[136]               | AACCGAGGAAAAACAAAATA                                         | 1   | 25 nmol |
| A-28[166]61[166]               | TTTTGAACAAAGTAAACATTTCTTTT                                   | 1   | 25 nmol |
| A-28[85]61[76]                 | CTTATCGAGCTTCAAATCGCACT                                      | 1   | 25 nmol |
| A-29[147]2[144]                | AAGTAAGAATCCTCTGGCCTTACAGCTTCAGCGAAGGAACGAGGG                | 1   | 25 nmol |
| A-29[54]29[83]                 | TTTTGGAAGCAAATCCATTGAGTTAAGCC                                | 1   | 25 nmol |
| A-29[84]9[93]                  | CAATAATTGTACAGGAGTAATCTT                                     | 1   | 25 nmol |
| A-3[162]4[156]                 | CCGCCAGAGGTTTAGTAC                                           | 1   | 25 nmol |
| A-3[175]5[188]                 | AACCGCCGATCTAGAATTTCTGTATGGGTTTATTCGGAAC                     | 1   | 25 nmol |
| A-3[78]43[107]                 | TTTTGGGTAAAATCATAACCCATAACGAAATAGATACCAATCAATAATCGGCTGTTTTT  | 1   | 25 nmol |
| A-30[104]57[108]               | GAGCGCTAGAAAACAACTGGCACAAACGTAATAGTGCCTTTTTAACCT             | 1   | 25 nmol |
| A-30[153]11[166]               | TTAGAGCAATAACACGCCACCCCTCAGAGCCGCCACTTTT                     | 1   | 25 nmol |
| A-30[166]63[166]               | TTTTGGAAGCGCAACAGTAACATTTT                                   | 1   | 25 nmol |
| A-31[54]65[76]                 | TTTTGAGAGTACCTTTAATTGCTATAATGCATGTGCT                        | 1   | 25 nmol |
| A-31[84]11[104]                | ATAAGAGACCCAAAAGGCTTGCCCTGACGAGAAAC                          | 1   | 25 nmol |
| A-31[98]10[107]                | TTGCGTTTTGTTACACCA                                           | 1   | 25 nmol |
| A-32[125]27[131]               | CCCAATCAAATGAAGAAACAAAGCTATCTAATAACGTTAAAGGTGGTTTT           | 1   | 25 nmol |
| A-32[166]65[166]               | TTTTATTTGCCAGTCCGATTATTTT                                    | 1   | 25 nmol |
| A-33[105]35[115]               | CCAGCTAATCAAGATACCGCGCCCA                                    | 1   | 25 nmol |
| A-33[54]34[54]                 | TTTTGTTTTAAATATAATTCTGCGAACTTTT                              | 1   | 25 nmol |
| A-34[153]35[166]               | TTTAGCGCCGTTACTTAAGAATTTT                                    | 1   | 25 nmol |
| A-34[166]33[166]               | TTTTGCGAGGCGTCAGAGCCTATTTT                                   | 1   | 25 nmol |
| A-34[99]8[77]                  | TGCTTTCAATCCATATAACAGTTGTGAATATCAACGTTTCAAAACAGGC            | 1   | 25 nmol |
| A-35[116]7[131]                | ATAGCAAGCATTTTGAAGGAACCGCCGACAGAGGAGCTGGCTTTTGATTTT          | 1   | 25 nmol |
| A-35[133]8[143]                | TATAGAAGGCTTATAACCTCCACCGCTCTCAGAGAGACGATATTA                | 1   | 25 nmol |
| A-35[54]36[54]                 | TTTTGAGTAGATTTAGATAACCTGTTTTTTT                              | 1   | 25 nmol |
| A-35[83]34[100]                | TACTTTTCATCGTAGGAATCATTAGT                                   | 1   | 25 nmol |
| A-36[104]36[81]                | TTTTTGCAAGCGGTTTTTAATTTT                                     | 1   | 25 nmol |
| A-37[54]7[63]                  | TTTTGCTATATTTTTCATCTACTATTGCGCTTTTCCAG                       | 1   | 25 nmol |
| A-37[83]38[81]                 | CTGCTCATCCGCAAAAAG                                           | 1   | 25 nmol |
| A-38[107]37[104]               | TTTTTTTAAACCAAGTACGAGAACAATTTTT                              | 1   | 25 nmol |
| A-39[47]7[63]                  | TTTTTTAACATCCAATAAATCATAGCTAAACGGGGAGCGTATTG                 | 1   | 25 nmol |
| A-4[111]1[115]                 | AAAGTACCAGGACCAACCCGACTAAAGTTA                               | 1   | 25 nmol |
| A-4[155]3[161]                 | CGCCACTCAAAAACACCCCTCAGAA                                    | 1   | 25 nmol |
| A-4[181]2[168]                 | ATCACCGGCTATTGAGCTTGCTTTTCAAGTAAATAAGTTTT                    | 1   | 25 nmol |
| A-4[222]2[210]                 | CCGTCGGAGGCTGAAAAAAGGCTCCAAACAGTTTAGCATT                     | 1   | 25 nmol |
| A-40[107]39[107]               | TTTTTTCCAAGATTAAGCAAAAACGGGATTTTTT                           | 1   | 25 nmol |
| A-40[76]7[192]                 | AGCATAAACAGGCACATCAATTTTGGGGGAATGGCTAATGCGCGAACTGATAGCTTTT   | 1   | 25 nmol |
| A-41[47]41[76]                 | TTTTTAAACATTATGACCCGTGAATACTTT                               | 1   | 25 nmol |
| A-42[107]41[107]               | TTTTTTCTTCCCAACTTATTTTATCATTTTTT                             | 1   | 25 nmol |

|                  |                                                               |   |         |
|------------------|---------------------------------------------------------------|---|---------|
| A-42[72]80[66]   | AGAACCCTCAGATTGCCTGGC                                         | 1 | 25 nmol |
| A-42[80]47[102]  | AAATTGTAGAAAAGTCCTACATGTTCCGACAAAACAGTCAAATCAATTTTCGAGCCAGT   | 1 | 25 nmol |
| A-43[47]44[47]   | TTTTGCAATGCCCATCATATCCTGAGTATTTT                              | 1 | 25 nmol |
| A-44[107]14[91]  | TTTTTCTGTTTATCAACCCAAAAGTTGAGATACGAACTATTATAC                 | 1 | 25 nmol |
| A-44[69]81[85]   | AAAAATACTAATTTCTACATACATTGGCAGATTTCCAGTTTT                    | 1 | 25 nmol |
| A-45[47]46[47]   | TTTTATGTGTACAGACCTGTCGGTAAAGTTT                               | 1 | 25 nmol |
| A-46[107]18[95]  | TTTTTAATAAGAGAATATAGCGAGACA                                   | 1 | 25 nmol |
| A-46[72]84[63]   | TAAAGTAATTGACGACAGGCCTTG                                      | 1 | 25 nmol |
| A-47[47]48[50]   | TTTTATTCAAAGGGTAGCTGATAATTTT                                  | 1 | 25 nmol |
| A-48[100]89[89]  | TTTTTCAGAGGCCATCAATATGAGTTTTTATATTTT                          | 1 | 25 nmol |
| A-49[50]50[50]   | TTTTTAATGCCCAGAGCTGTGTTTT                                     | 1 | 25 nmol |
| A-49[77]49[100]  | TTTTTGAGAGATATTTAGGTTTTT                                      | 1 | 25 nmol |
| A-5[114]66[109]  | TAAGTACAACCACAGCATTCCAGAACACGTCAACAAAATAAGGAACAAAACCTCGTATT   | 1 | 25 nmol |
| A-5[126]1[139]   | GGGTGAGCGATTATAAAGAGGCCAAAAGAACGGCTATCGTCA                    | 1 | 25 nmol |
| A-5[150]9[166]   | CCCGTATAAACTTCTTAAGATATTCACTTTT                               | 1 | 25 nmol |
| A-5[189]1[202]   | CTATTATCCCGGAAGAGCCACCACCCTCCAGCCCTGCTAAAC                    | 1 | 25 nmol |
| A-50[131]6[115]  | TTTTTTAATGAGAAATCGCCCGCTCAATGAATTAATTGACGAGTG                 | 1 | 25 nmol |
| A-50[69]85[85]   | ATTGCCGTGAGAGGCCGTTCTGAGAAAAGTAAACCGTCACTTGCTGAGTAGAAGATTT    | 1 | 25 nmol |
| A-50[73]51[92]   | GGTCCGATGAACGGTAATCGTAAAAAT                                   | 1 | 25 nmol |
| A-50[97]91[89]   | CAACATGTACTACAAAGGCTAAGGAGGCCGTTTT                            | 1 | 25 nmol |
| A-51[102]94[91]  | ATATCATATGCTGCGCACGGGAAAGCCGG                                 | 1 | 25 nmol |
| A-51[50]52[50]   | TTTTGAGCAAAACACGGTTGATATTTT                                   | 1 | 25 nmol |
| A-51[93]22[84]   | CTTACTTGAGCCATTTGGG                                           | 1 | 25 nmol |
| A-52[131]93[131] | TTTTTACTAGAAAACGCCGCGCTTTTT                                   | 1 | 25 nmol |
| A-52[92]94[77]   | TACAAACTAGCATGTGCTGCGTGGCAGGCGAGA                             | 1 | 25 nmol |
| A-53[50]95[65]   | TTTTATCAGAAAATATTTTCTACGTGAAC                                 | 1 | 25 nmol |
| A-53[84]24[93]   | TATAAAAATAAGCGGACATT                                          | 1 | 25 nmol |
| A-54[114]60[105] | TGGGTTAATTTGAAATGCTTAGGCGCTGAGAACATAGATGTGAGTGAATAA           | 1 | 25 nmol |
| A-54[131]95[131] | TTTTGACCTAAATAACCCATAATTTT                                    | 1 | 25 nmol |
| A-54[92]95[83]   | GATAGCAAATATTTAATCAAGTT                                       | 1 | 25 nmol |
| A-55[108]50[98]  | TTTATTTGAAAAGAATAATTTAGTAAAGCCAAATATTTAACAACGC                | 1 | 25 nmol |
| A-55[40]56[40]   | TTTTTTAAATTTTGTCTGGCCCTCCTGTTTT                               | 1 | 25 nmol |
| A-55[87]59[97]   | AGAAAACTTTTAATCGCAAGACTACAATTTATTTTTCCC                       | 1 | 25 nmol |
| A-56[131]55[131] | TTTTATACTATATCATCTCTTTTT                                      | 1 | 25 nmol |
| A-56[85]57[76]   | AAGAGGAACGCCATCATGAGCGA                                       | 1 | 25 nmol |
| A-57[109]4[112]  | CCGGCTGATGTACAATAAGACAAGGTAATTCACCGTATTACCATTAGCAAGCGAAAAC    | 1 | 25 nmol |
| A-57[40]58[40]   | TTTTTAGCCAGCTTCAACGGCGGATTGTTTT                               | 1 | 25 nmol |
| A-57[66]24[50]   | AATGAAAATAATCAGGTCAACGAGAATGACCATATTTT                        | 1 | 25 nmol |
| A-57[77]56[86]   | GTAACAGGTCTGAGAGACA                                           | 1 | 25 nmol |
| A-58[131]57[131] | TTTTAGATTAAAGATTGGGTTATTTTT                                   | 1 | 25 nmol |
| A-58[85]59[76]   | TCATAACCCGTGCGATGTAGATG                                       | 1 | 25 nmol |
| A-59[40]60[43]   | TTTTACCCTAATGGGAAGGGGACGATTTT                                 | 1 | 25 nmol |
| A-59[66]26[50]   | TGTTCTCCGTTCAAATAAGATTAAAGAGAAAGCCTTTT                        | 1 | 25 nmol |
| A-59[77]58[86]   | GGCGCATTAATTAACAAAA                                           | 1 | 25 nmol |
| A-6[114]5[113]   | TACTGGCGACAATCCGTAA                                           | 1 | 25 nmol |
| A-6[131]23[131]  | TTTTTGATACAGGGAAATATTTTTT                                     | 1 | 25 nmol |
| A-6[80]23[92]    | CGAGATCCCCCTCAAACGAT                                          | 1 | 25 nmol |
| A-60[104]26[105] | CCTTGCTTTAGAATCCTTGAAAAGAGTCAGAAAATCGCAAAG                    | 1 | 25 nmol |
| A-60[135]1[132]  | AGTACATAAACATCAAGACGCAATTACCGAAGGAAAGCGGTTGAGCGCCGACTTGCGGG   | 1 | 25 nmol |
| A-60[166]28[147] | TTTTATTTGAATTACCTTTTTACATTTTTACCAGA                           | 1 | 25 nmol |
| A-60[69]28[54]   | CATCTGCAGGAAGAGCGAAACAGACCTTTTT                               | 1 | 25 nmol |
| A-60[97]60[70]   | TCTGTAATCGTTCGCTATCGTAACCGTG                                  | 1 | 25 nmol |
| A-61[105]8[98]   | AAAAGAACAAAAGAATGAAATTACCGTTCCACAGA                           | 1 | 25 nmol |
| A-61[43]62[43]   | TTTTGACAGTATCGGAAACCATTTT                                     | 1 | 25 nmol |
| A-61[77]28[86]   | CCAGCTTATTCAATTGACTC                                          | 1 | 25 nmol |
| A-62[114]30[105] | GAATACCAAGAGAAATAGGTAATT                                      | 1 | 25 nmol |
| A-62[135]10[126] | ACGGATTGCGATTTTCAAACCCCTAATAGCACCTCAGA                        | 1 | 25 nmol |
| A-62[166]63[153] | TTTTGTACCTTTTACATCGGTGAATAT                                   | 1 | 25 nmol |
| A-62[90]63[69]   | AGAGGGAAACAGCTTCCGGCACCGCTCCATTCA                             | 1 | 25 nmol |
| A-63[43]64[43]   | TTTTGGCAAAGCGTCTTCGCTATTTT                                    | 1 | 25 nmol |
| A-63[70]30[84]   | GGCTGCGCAACTTCAAAAATTAGAGAGAT                                 | 1 | 25 nmol |
| A-64[108]32[98]  | ATAAATTTTGGCAAACGATTGATGG                                     | 1 | 25 nmol |
| A-64[139]35[132] | ATAATCCTGATTGTACCAGAATATTTATATCTTACCGGGAGGAATCAGA             | 1 | 25 nmol |
| A-64[166]33[153] | TTTTTCAGATGATGGCAATTATCATATTTACAAAAGTCTTTC                    | 1 | 25 nmol |
| A-64[62]59[65]   | GCGGGCCCCATTGCTGGTGCCGCGCTCCAGTTTGTAGGTCACGT                  | 1 | 25 nmol |
| A-64[69]32[54]   | GATCGGTAAGGGGGTGTAGCTCAACATTTT                                | 1 | 25 nmol |
| A-65[43]66[43]   | TTTTTTACGCCAGTTTCCAGTTTTT                                     | 1 | 25 nmol |
| A-65[86]33[104]  | AAGTTCTTAATTTGTGTCTGGAAGTATTTTGGCAC                           | 1 | 25 nmol |
| A-66[108]69[115] | AAATATCTAAACTGGTCAGGTCAGTATTA                                 | 1 | 25 nmol |
| A-66[129]69[136] | AACAACATAACATCAACAACAGTGCCA                                   | 1 | 25 nmol |
| A-66[166]67[150] | TTTTACATTTGAGGATTTAGGCCG                                      | 1 | 25 nmol |
| A-66[76]67[69]   | TAAGTTGGGTAACGGACGGCC                                         | 1 | 25 nmol |
| A-66[91]65[85]   | GTTATTAATTGCGATGCAAGTTAA                                      | 1 | 25 nmol |
| A-67[122]62[115] | GAGCATTCGACAGAAAACCTTGGATTGCGTAGCTGATTGCTTT                   | 1 | 25 nmol |
| A-67[140]60[136] | GATTAGAAAAGTATTAATATCCATCAATCGTCAGAGAGAAAACAAATTAATTAATGAAAAC | 1 | 25 nmol |
| A-67[151]69[166] | TCAATCACCTCAGCAGCAAATGAAAATTTT                                | 1 | 25 nmol |
| A-67[43]65[62]   | TTTTCACGACGTTGTAAAACCCAGGGTCTGGCGA                            | 1 | 25 nmol |
| A-67[91]61[104]  | AATTGAGGAAGGTTCCCTTGGCATTATCTGGAAGGGTAAAACCTACAAAACCTGAGC     | 1 | 25 nmol |
| A-68[166]67[166] | TTTTATCTAAAGCATAGATAATTTTT                                    | 1 | 25 nmol |
| A-68[69]68[43]   | TAGAGGATCCCGGGTACCGAGCTTTT                                    | 1 | 25 nmol |
| A-68[81]30[54]   | GCAGGAAGTACGGCTGAATCCTTTTGAACCCACAAGAAACAGGTCAGGATTATTTT      | 1 | 25 nmol |
| A-69[116]33[125] | ACACCCGCTGCCCTCAAATCCTGA                                      | 1 | 25 nmol |
| A-69[137]28[143] | CGCTGAGAGCTGCTGAAAACGAGCATAAACACAGAGGGAGAATTTAAGAAAAGGA       | 1 | 25 nmol |
| A-69[43]69[69]   | TTTTTCGAATTCGTAATCATGGCCGAA                                   | 1 | 25 nmol |
| A-69[96]68[82]   | AGGTGAGCGGTTGGCAAATCAACAGTTGGCCT                              | 1 | 25 nmol |
| A-7[112]64[109]  | CATACATCTGAATTAGCAAATAGTCAGAGAAGAAATATACTTCTGA                | 1 | 25 nmol |
| A-7[77]27[76]    | ACCGAACGGATTGCATCAAATTCGCGTT                                  | 1 | 25 nmol |
| A-70[69]70[43]   | AAATATCATAGCTGTTTCTGTGTTTT                                    | 1 | 25 nmol |
| A-70[92]35[82]   | TTTTCTAAAACATCGATTAGA                                         | 1 | 25 nmol |
| A-71[43]71[69]   | TTTTTGAAATTTGTTATCCGCTCGTCTT                                  | 1 | 25 nmol |
| A-72[69]72[43]   | TATTAACAATTTCCACACAACATATTTT                                  | 1 | 25 nmol |
| A-72[92]37[82]   | TTTTGACAATATTTTTCGCGAG                                        | 1 | 25 nmol |
| A-73[43]74[56]   | TTTTCGAGCCGGAAGCATAAAGGAAAGGACCTTGTAAGGCC                     | 1 | 25 nmol |
| A-74[85]73[92]   | TTTTTAGAACCCCTTCTGTAAGAAATACGTGGCACATTTT                      | 1 | 25 nmol |

|                                          |                                                                                                                                                                                                                                                                                                          |     |                 |
|------------------------------------------|----------------------------------------------------------------------------------------------------------------------------------------------------------------------------------------------------------------------------------------------------------------------------------------------------------|-----|-----------------|
| A-75[36]76[36]                           | TTTTTGAGCTAACGTGCCAGCTTTT                                                                                                                                                                                                                                                                                | 1   | 25 nmol         |
| A-75[49]74[36]                           | TCACATTTGGGGTGCCTAATGAGTTTT                                                                                                                                                                                                                                                                              | 1   | 25 nmol         |
| A-75[56]38[47]                           | AATTGCGATAGTAGTAGCATT                                                                                                                                                                                                                                                                                    | 1   | 25 nmol         |
| A-76[62]40[47]                           | TCGGGAACACCGCGTGGTTGACCATTTT                                                                                                                                                                                                                                                                             | 1   | 25 nmol         |
| A-76[85]75[85]                           | TTTTCTGGCCACCCGCCACTGACAGAGATTTT                                                                                                                                                                                                                                                                         | 1   | 25 nmol         |
| A-77[36]76[49]                           | TTTTGCATTAAATGAATCGGCACCTGTC                                                                                                                                                                                                                                                                             | 1   | 25 nmol         |
| A-78[62]42[47]                           | GGCGCCAAACAGCTTATATTTAAATTTTT                                                                                                                                                                                                                                                                            | 1   | 25 nmol         |
| A-78[85]77[85]                           | TTTTATAAAAGTTTGGAGCGGGACATTTTTT                                                                                                                                                                                                                                                                          | 1   | 25 nmol         |
| A-79[36]80[36]                           | TTTTACCAGTAAAGCGGTCCTTTT                                                                                                                                                                                                                                                                                 | 1   | 25 nmol         |
| A-79[49]78[36]                           | GACGGCGGGTGGTTTTTCTTTTTTTTT                                                                                                                                                                                                                                                                              | 1   | 25 nmol         |
| A-8[142]63[139]                          | AAGCCAGAATGCCCTTTTAACTGAGGTTTAA                                                                                                                                                                                                                                                                          | 1   | 25 nmol         |
| A-8[166]29[166]                          | TTTTAAACAAATACAGATAGCCTTTT                                                                                                                                                                                                                                                                               | 1   | 25 nmol         |
| A-8[97]64[70]                            | TGAACGGAAGAGCAAATATCATTTCACCGTTAGAACCCTACCATAGTTGGGAAGGGC                                                                                                                                                                                                                                                | 1   | 25 nmol         |
| A-80[65]84[56]                           | CCTGAGAGAGATTATTTTTGACGCGCCAGCCTGGTAA                                                                                                                                                                                                                                                                    | 1   | 25 nmol         |
| A-80[85]79[85]                           | TTTTTCACACGCCGCCCTTCAACCAAGTATTTT                                                                                                                                                                                                                                                                        | 1   | 25 nmol         |
| A-81[36]80[49]                           | TTTTACGCTGGCTGAAATGGTTGCAGC                                                                                                                                                                                                                                                                              | 1   | 25 nmol         |
| A-82[85]42[73]                           | TTTTCTCATGGAAATAACGAGCATT                                                                                                                                                                                                                                                                                | 1   | 25 nmol         |
| A-83[36]82[36]                           | TTTTCAGCAGGCAATATTACCTCAATCGTTTTGCCCTTTT                                                                                                                                                                                                                                                                 | 1   | 25 nmol         |
| A-83[63]83[85]                           | CATTGCAACAGGAAAAACGTTTT                                                                                                                                                                                                                                                                                  | 1   | 25 nmol         |
| A-84[85]44[70]                           | TTTTACTCAAATATCATAAACAGAAACAAG                                                                                                                                                                                                                                                                           | 1   | 25 nmol         |
| A-85[36]84[36]                           | TTTTCTGTTTTGATTAGTATATCCAGAACGAAAAATTTTT                                                                                                                                                                                                                                                                 | 1   | 25 nmol         |
| A-85[56]88[40]                           | ATAACATTGTAGCAAATCCCTAAGAATAGCCCGAGATAGTTTT                                                                                                                                                                                                                                                              | 1   | 25 nmol         |
| A-86[85]46[73]                           | TTTTCATCACGCAAATGCCGGAAGG                                                                                                                                                                                                                                                                                | 1   | 25 nmol         |
| A-87[36]86[36]                           | TTTTGTTCCGAAATCGGCAAATCTTCTTGATGGTGT                                                                                                                                                                                                                                                                     | 1   | 25 nmol         |
| A-87[63]87[85]                           | TATAATAAAAGAGTCTGCTTTT                                                                                                                                                                                                                                                                                   | 1   | 25 nmol         |
| A-88[89]88[63]                           | TTTTATCAGTGAGGCCACCGAGATCAA                                                                                                                                                                                                                                                                              | 1   | 25 nmol         |
| A-89[40]89[62]                           | TTTTGTTGAGTGTGTTCCGCCA                                                                                                                                                                                                                                                                                   | 1   | 25 nmol         |
| A-9[94]9[111]                            | GACAAGAACAGCCGCCGC                                                                                                                                                                                                                                                                                       | 1   | 25 nmol         |
| A-90[62]90[40]                           | CGGTACAGTTTGGAAACAAGTTTT                                                                                                                                                                                                                                                                                 | 1   | 25 nmol         |
| A-90[89]89[69]                           | TTTTATAAAGGGATTTAGACAGGAAGAATCCT                                                                                                                                                                                                                                                                         | 1   | 25 nmol         |
| A-91[40]91[62]                           | TTTTAGTCCACTATTAATCAG                                                                                                                                                                                                                                                                                    | 1   | 25 nmol         |
| A-92[100]52[93]                          | TGTTGCTTTCGGTACCCTTTA                                                                                                                                                                                                                                                                                    | 1   | 25 nmol         |
| A-92[131]24[112]                         | TTTTAATGCGCCGCTACAGCCACACCAAGCCTGACACCGGAGCGCCA                                                                                                                                                                                                                                                          | 1   | 25 nmol         |
| A-92[62]92[40]                           | TTAGAGAAGTGGACTCCATTTT                                                                                                                                                                                                                                                                                   | 1   | 25 nmol         |
| A-92[76]25[85]                           | ACGTGCTTAGGGCAATCATAAAACAGGTTTCAGAATTTACCCTGACTATTA                                                                                                                                                                                                                                                      | 1   | 25 nmol         |
| A-93[40]93[62]                           | TTTTACGTCAAAGGGCGAAAGGA                                                                                                                                                                                                                                                                                  | 1   | 25 nmol         |
| A-94[131]54[115]                         | TTTTGGGAGCCCGATTTAAATCGGTTAA                                                                                                                                                                                                                                                                             | 1   | 25 nmol         |
| A-94[62]94[40]                           | AGCGAAAAACCGTCTATCATT                                                                                                                                                                                                                                                                                    | 1   | 25 nmol         |
| A-94[76]55[86]                           | AAGGAAGACCCAAAATTTGTAATTTTAAACCAATACCGC                                                                                                                                                                                                                                                                  | 1   | 25 nmol         |
| A-94[90]92[77]                           | CGAACGTAGTGTAGGACGAGCAGTATA                                                                                                                                                                                                                                                                              | 1   | 25 nmol         |
| A-95[108]92[101]                         | CACTGAGCTTGGTAAACAGGCGGTACTA                                                                                                                                                                                                                                                                             | 1   | 25 nmol         |
| A-95[40]54[40]                           | TTTTGGCGATGGCCATTAAAATTCGCATTTT                                                                                                                                                                                                                                                                          | 1   | 25 nmol         |
| A-95[66]50[74]                           | CATCGGAAGAAGCGGGCTTCTCGAGCGGGAGCTAAACTCA                                                                                                                                                                                                                                                                 | 1   | 25 nmol         |
| A-95[84]54[93]                           | TTTTGGGGTCCGAGCGGTG                                                                                                                                                                                                                                                                                      | 1   | 25 nmol         |
| A-5[231]3[253]                           | TCAAGAGCCAGGCGACCCATGTACCCTAACACTTTTT                                                                                                                                                                                                                                                                    | 1   | 25 nmol         |
| B-0[260]5[257]                           | TTTTCGAATAATAATTAGGATTAGCTTTT                                                                                                                                                                                                                                                                            | 2   | 25 nmol         |
| C-anchor-0[260]5[257]                    | CAACTAAGCCTTTTTCGAATAATAATTAGGATTAGCTTTT                                                                                                                                                                                                                                                                 | 3   | 25 nmol         |
| G-9[64]10[64]                            | TTTTGGCTGACCTAACAAAGCTTTTT                                                                                                                                                                                                                                                                               | 4   | 25 nmol         |
| G-17[68]18[68]                           | TTTTCTAATGCAGATACTCGTTTACCAGTTTT                                                                                                                                                                                                                                                                         | 4   | 25 nmol         |
| G-18[94]2[78]                            | CTATACGTAATGAAGTTTCCATTAAACTTTT                                                                                                                                                                                                                                                                          | 4   | 25 nmol         |
| G-20[97]4[82]                            | CAGAGGGTACCAGATTTGTATCATCTTTT                                                                                                                                                                                                                                                                            | 4   | 25 nmol         |
| G-21[61]22[61]                           | TTTTTAGCGTCCAATACTGAGCCAATTAGCGGAATCGTCATATTTT                                                                                                                                                                                                                                                           | 4   | 25 nmol         |
| G-23[61]6[61]                            | TTTTAATTCATTGAGCGCAGACGGTCTTTT                                                                                                                                                                                                                                                                           | 4   | 25 nmol         |
| G-36[80]12[64]                           | GCAATCATTGTTGAGATGGTTAAATTTTTTT                                                                                                                                                                                                                                                                          | 4   | 25 nmol         |
| G-38[80]14[68]                           | GTGGAGGCAAAAGACGTTGGGAAGTTTT                                                                                                                                                                                                                                                                             | 4   | 25 nmol         |
| G-40[80]16[68]                           | TCAGTCCGGGATACCACATTCAATTTT                                                                                                                                                                                                                                                                              | 4   | 25 nmol         |
| G-5[82]0[85]                             | TTTTGCCTGATAAAATTCGGATATTTTTT                                                                                                                                                                                                                                                                            | 4   | 25 nmol         |
| G-7[61]8[64]                             | TTTTAATCATAAGGAGCATAGGCTTTTT                                                                                                                                                                                                                                                                             | 4   | 25 nmol         |
| G-89[70]20[61]                           | GAGAAGTATTCAAGTAGCTAGTTTAGACTGGATTTT                                                                                                                                                                                                                                                                     | 4   | 25 nmol         |
| H-9[64]10[48]-FL                         | TTTTGGCTGACCTAACAAAGCTACCACCTCCTTACTACTCCC                                                                                                                                                                                                                                                               | 5   | 25 nmol         |
| H-17[72]18[52]-FL                        | TTTTCTAATGCAGATACTCGTTTACCAGACCCACCTCCTTACTACTCCC                                                                                                                                                                                                                                                        | 5   | 25 nmol         |
| H-18[94]2[62]-FL                         | CTATACGTAATGAAGTTTCCATTAAACACACCTCCTTACTACTCCC                                                                                                                                                                                                                                                           | 5   | 25 nmol         |
| H-20[97]4[66]-FL                         | CAGAGGGTACCAGATTTGTATCATCACCCACCTCCTTACTACTCCC                                                                                                                                                                                                                                                           | 5   | 25 nmol         |
| H-21[61]22[45]-FL                        | TTTTTAGCGTCCAATACTGAGCCAATTAGCGGAATCGTCATAACCACCTCCTTACTACTCCC                                                                                                                                                                                                                                           | 5   | 25 nmol         |
| H-23[61]6[45]-FL                         | TTTTAATTCATTGAGCGCAGACGGTCCACACCTCCTTACTACTCCC                                                                                                                                                                                                                                                           | 5   | 25 nmol         |
| H-36[80]12[48]-FL                        | GCAATCATTGTTGAGATGGTTAAATTTACCACCTCCTTACTACTCCC                                                                                                                                                                                                                                                          | 5   | 25 nmol         |
| H-38[80]14[52]-FL                        | GTGGAGGCAAAAGACGTTGGGAAGACCACCTCCTTACTACTCCC                                                                                                                                                                                                                                                             | 5   | 25 nmol         |
| H-40[80]16[52]-FL                        | TCAGTCCGGGATACCACATTAAACACCTCCTTACTACTCCC                                                                                                                                                                                                                                                                | 5   | 25 nmol         |
| H-5[82]0[69]-FL                          | TTTTGCCTGATAAAATTCGGATATATACCACCTCCTTACTACTCCC                                                                                                                                                                                                                                                           | 5   | 25 nmol         |
| H-7[61]8[48]-FL                          | TTTTAATCATAAGGGAGCATAGGCTACCACCTCCTTACTACTCCC                                                                                                                                                                                                                                                            | 5   | 25 nmol         |
| H-89[70]20[45]-FL                        | GAGAAGTATTCAAGTAGCTAGTTTAGACTGGAACACCTCCTTACTACTCCC                                                                                                                                                                                                                                                      | 5   | 25 nmol         |
| I-B-4[257]0[237]                         | TTTTGGGGTTTTGCTCAGTAAAGGATTTTTTTCAG                                                                                                                                                                                                                                                                      | 6   | 25 nmol         |
| I-B-0[236]4[223]                         | TTGAAAATAGAAACAGTACAAACTACAAATAGGAGATAAGTG                                                                                                                                                                                                                                                               | 6   | 25 nmol         |
| I-B-2[253]1[260]                         | TTTTGAGTTTCGTCACGGAACAATAAAGGAATGTTTT                                                                                                                                                                                                                                                                    | 6   | 25 nmol         |
| J-3-0[244]1[237]                         | TTTTACAGTTGAAAATAGAAA                                                                                                                                                                                                                                                                                    | 7   | 25 nmol         |
| J-3-2[253]4[223]                         | TTTTGAGTTTCGTCACAGTACAAACTACAAATAGGAGATAAGTG                                                                                                                                                                                                                                                             | 7   | 25 nmol         |
| J-3-4[257]5[244]                         | TTTTGGGGTTTTGCTCAGTAAAGGATT                                                                                                                                                                                                                                                                              | 7   | 25 nmol         |
| K-3'add                                  | GGAACAATAAAGGAATTCGCCGCCGCGCGC                                                                                                                                                                                                                                                                           | 8   | 25 nmol         |
| <b>Functionalized Oligonucleotides</b>   |                                                                                                                                                                                                                                                                                                          |     |                 |
| cy5 label                                | /5Cy5/GGGAGTAGTAAGGAGGTGGT                                                                                                                                                                                                                                                                               | N/A | 100 nmol, HPLC  |
| texas red label                          | /5TexRd-XN/GGGAGTAGTAAGGAGGTGGT                                                                                                                                                                                                                                                                          | N/A | 100 nmol, HPLC  |
| <b>Aptamer Template Oligonucleotides</b> |                                                                                                                                                                                                                                                                                                          |     |                 |
| apt for SPOT, anti-sense strand          | CCGGCCGGCGCGGGAGAAGCTTCTGTGGTGGCCCTCTTTAAGGACTTCCCCACCCAATTGCGCCACGACGTTTC                                                                                                                                                                                                                               | N/A | 4 nmol Ultramer |
| apt for SPOT, sense strand               | GTGCTCCCATCGCAGTCCAGAAAGCTTCCCTATAGTGAGTCGTATTAG<br>CTAATACGACTCACTATAGGGAGAAGCTTCTGGACTGCGATGGGAGCACGAAACGTCGTGGCGCAATTGGTGGGGAA<br>AAGTCCCTAAAAGAGGGCCACCACAGAAGCTTCTCCCGCCGCGGCGCG<br>CTAATACGACTCACTATAGGGAGCTTCTGGACTGCGATGGGAGCACGAAACGTCGTGGCGCAATTGGTGGGGAAAG<br>TCCTTAAAAGAGGGCCACCACAGAAGCTCCC | N/A | 4 nmol Ultramer |
| free apt, anti-sense strand              | GGGAGCTTCTGTGGTGGCCCTCTTTAAGGACTTCCCCACCCAATTGCGCCACGACGTTTCGTGCTCCCATCGCAGT<br>CCAGAAGCTCCCTATAGTGAGTCGTATTAG<br>CAACTAAGCCAGCTTCTGGTGGCCCTCTTTAAGGACTTCCCCACCCAATTGCGCCACGACGTTTCGTGCTCCCA<br>TCGCACTCCAGAAGCTCAATTCCTTTAGTTTCTTATAGTGAGTCGTATTAG                                                      | N/A | 4 nmol Ultramer |
| free apt, sense strand                   | CAACTAAGCCAGCTTCTGGTGGCCCTCTTTAAGGACTTCCCCACCCAATTGCGCCACGACGTTTCGTGCTCCCA<br>TCGCACTCCAGAAGCTCAATTCCTTTAGTTTCTTATAGTGAGTCGTATTAG                                                                                                                                                                        | N/A | 4 nmol Ultramer |
| rigid apt for SPOT, anti-sense strand    | CAACTAAGCCAGCTTCTGGTGGCCCTCTTTAAGGACTTCCCCACCCAATTGCGCCACGACGTTTCGTGCTCCCA<br>TCGCACTCCAGAAGCTCAATTCCTTTAGTTTCTTATAGTGAGTCGTATTAG                                                                                                                                                                        | N/A | 4 nmol Ultramer |
| rigid apt, sense strand                  | CAATACGACTCACTATAGGAACAATAAA                                                                                                                                                                                                                                                                             | N/A | 25 nmol         |

**Table S2** – Mixtures of staples required to produce SPOTs and their derivatives or precursors, related to STAR Methods.

| <b>Construct</b>                   | <b>Required Staple Mixes from Table S1</b> | <b>Required Additional Reagents</b> |
|------------------------------------|--------------------------------------------|-------------------------------------|
| Signpost origami (SPO)             | 1, 2, 4, 6                                 | -                                   |
| SPO with Texas red label           | 1, 2, 5, 6                                 | Texas red labeled oligo             |
| SPO with cy5 label                 | 1, 2, 5, 6                                 | cy5 labeled oligo                   |
| SPOT (SPO with aptamer)            | 1, 2, 4, 7, 8                              | Transcribed aptamer                 |
| SPOT with Texas red label          | 1, 2, 5, 7, 8                              | aptamer, Texas red label            |
| SPOT with cy5 label                | 1, 2, 5, 7, 8                              | aptamer, cy5 label                  |
| SPOT with rigid aptamer attachment | 1, 3, 4, 8                                 | rigid aptamer                       |

**Table S3** – Primers used for cloning of fluorescent protein genes, related to STAR Methods.

| Description                                                                           | Primer type | Sequence                                                |
|---------------------------------------------------------------------------------------|-------------|---------------------------------------------------------|
| Primers for insertion of fluorescent protein genes in pEP98-gB                        | forward     | GGCGGGAATTCATGGTG<br>AGCAAGGGCGAG                       |
|                                                                                       | reverse     | GGCGGCTCGAGCTTGTA<br>CAGCTCGTCCATGC                     |
| Primers for insertion of TEV restriction site as linker into mCherry-gB in pEP98      | forward     | GGCGGGAATTCCGCCGA<br>CGCCACCAGG                         |
|                                                                                       | reverse     | gBGGCGGCTCGAGAACC<br>TGACTTCCAGTCCGCTC<br>CGACTTCCCCCGG |
| Primers for ligation independent cloning of fluorescent proteins into pET-28, plasmid | forward     | CACCACCACCACTGA                                         |
|                                                                                       | reverse     | AGTGGTGGTGGTGCTTAC<br>TTGTACAGCTC                       |
| Primers for ligation independent cloning of fluorescent proteins into pET-28, insert  | forward     | AGATTGGTGAGAATTTAT<br>ATTTTCAGGGCCATATGG<br>TGAGCAAGG   |
|                                                                                       | reverse     | AGTGGTGGTGGTGCTTAC<br>TTGTACAGCTC                       |
